# Supplementary material
Source: PubMed Central journal article supplement (PMC4784525)
Supplement: ramc007634.ww_default.pdf [file ramc007634.ww_default.pdf]

## **Web appendices: Supplementary material**

### **Content of supplemental material**

#### **The Sydney Diet Heart Study**

- I. Methods employed to recover, convert, confirm and verify SDHS data**
- II. Webtable 1 and Webfigure 1: Characteristics of raw data extracted from the 9-track magnetic tape**
- III. Ethical considerations**
- IV. Webfigure 2: Sydney Diet Heart Study procedure flow diagram**
- V. Webtable 2: Longitudinal Changes in PUFA, SFA, and the PUFA to SFA ratio**
- VI. Webtable 3: Subgroup analyses**
- VII. Webtable 4: Mortality outcomes according to longitudinal changes in dietary fatty acid intake, with missing data imputation**
- VIII. PUFA intervention meta-analysis methods and results**
  - a. Webtable 5: General characteristics of randomized controlled PUFA intervention trials**
  - b. Webtable 6: Dietary characteristics of randomized controlled PUFA intervention trials**
  - c. Webfigure 3: Funnel plot assessment for publication bias**
  - d. Webtable 7: Effects of LA-selective and mixed n-3/n-6 PUFA interventions on CHD, CVD and all-cause mortality in RCTs**
  - e. Webtable 8: LA-selective and mixed n-3/n-6 PUFA interventions have heterogeneous effects**
- IX. References**

## I. Methods employed to recover, convert, confirm and verify SDHS data

We obtained permission from an original study investigator (B. Leelarthapin) and approval from the NIH Office of Human Research Protection (OHSR exemption #5744) to recover and analyze de-identified Sydney Diet Heart Study (SDHS) data stored on a 9-track magnetic tape (**Webfigure 1**). Technical expertise in data recovery and conversion was provided by John Svec (Data Conversion Resource, Inc., Westminster, Colorado, USA), <http://www.dataconversionresource.com>. Computer Logics software was used to read the raw tape to disk via a Pertec interface with a 9-track unit attached to a Windows 98 box in pure DOS mode. The raw tape contained 1,228,364 bytes of data (**Webtable 1**), which was split into 10 logical files with standard zero-length separation blocks between files. The 10<sup>th</sup> file was written in standard 8-bit ASCII characters and was a standard internal tape trailer label. It identified that the tape was written on the 358<sup>th</sup> day of 1976 using Kronos operating system, version 53. The remaining raw tape data were found to be expressed in 6-bit, rather than standard 8-bit characters. The data format and the exact character conversion table code were identified and translated by trial and error. After multiple unsuccessful attempts, the correct conversion table was applied, ultimately resulting in readable ASCII characters, which were found to represent a related series of punched cards. After ASCII conversion, these data were arranged in consistent rows and columns for use in a modern spreadsheet. The master clinical data file (logical file 5) contained one unique row per randomized patient (n=458). Each row contained data from multiple punch cards which were separated by one or more ':' symbols. Each group of related punched cards was assembled into consistent alignment in one line per patient record. Repeating data patterns and column breaks were identified within each record, yielding candidate study variables by column. An extensive review of the literature identified all published data for continuous and categorical SDHS study variables. The identities of candidate variable columns were matched and confirmed by careful whole sample, group-specific, and between-group comparison with published study data, using descriptive statistics (e.g. means, standard deviations, distributions). Only variables that exactly matched published data were included. Similar methods were employed to identify entry characteristics and dietary variables. Careful inspection of data patterns and redundant data stored on several of the logical files provided additional clues for further confirmation of each candidate variable. All matching variables were further verified by an original study investigator in order to ensure accuracy (B. Leelarthapin).

## II. Webtable 1. Characteristics of the raw data extracted from the 2400 ft. 9-track magnetic tape

| Logical File | Raw Tape Size (bytes) | File contents                                            |
|--------------|-----------------------|----------------------------------------------------------|
| 1            | 138,102               | Unidentified statistical output (scientific notation)    |
| 2            | 61,542                | Programming code in text                                 |
| 3            | 62,943                | Summarized baseline characteristics and survival data    |
| 4            | 1,461                 | No recoverable data (binary source data)                 |
| 5            | 203,448               | Master longitudinal clinical data                        |
| 6            | 123,078               | Master longitudinal diet data                            |
| 7            | 315,804               | Unidentified statistical output (mostly negative values) |
| 8            | 85,119                | Summarized baseline and follow-up diet data              |
| 9            | 236,787               | Summarized dietary, clinical and survival data           |
| 10           | 80                    | ASCII tape trailer label                                 |
| <b>Total</b> | <b>1,228,364</b>      | <b>10 logical files</b>                                  |

ASCII=American Standard Code for Information Interchange

**Webfigure 1: Photograph of 9-track magnetic tape with original Sydney Diet Heart Study data**

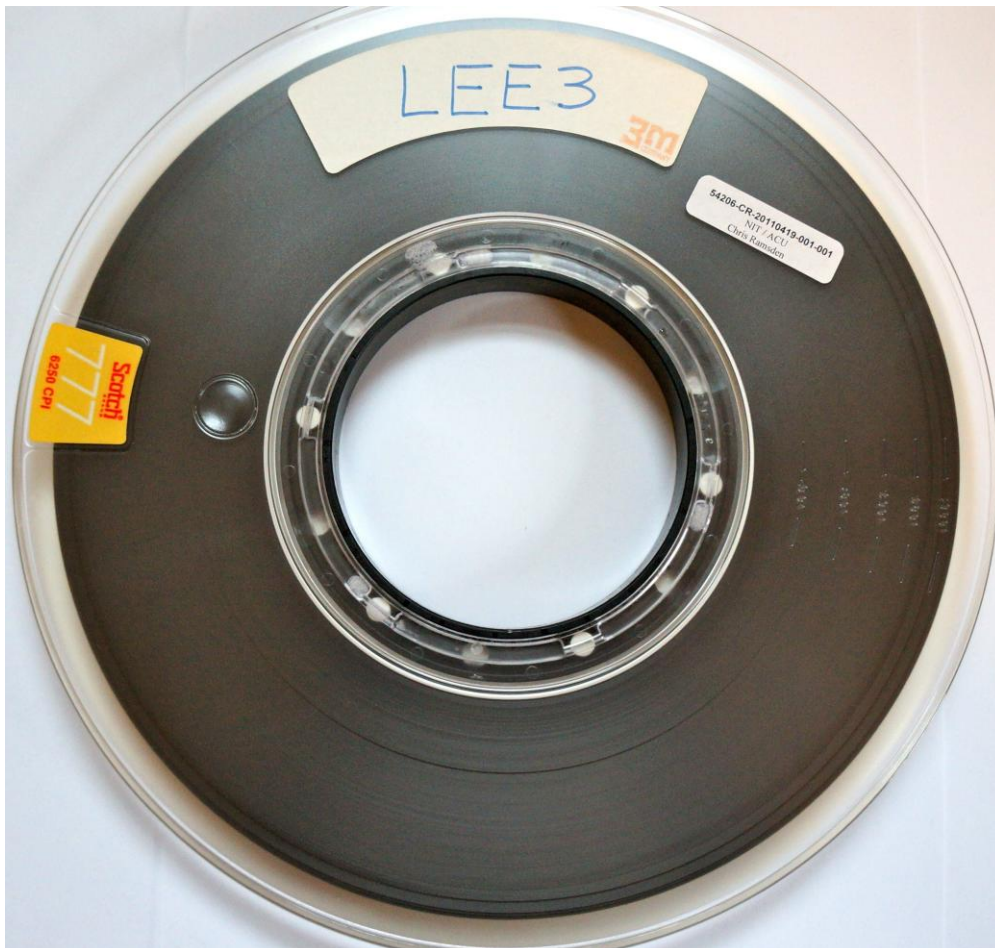

### **III. Ethical considerations**

The SDHS study protocol and patient consent forms were approved by the Dean of the Faculty of Medicine, University of New South Wales, Sydney, Australia. Medical research and clinical practice procedures were carried out according to the June 1964 World Medical Association Declaration of Helsinki<sup>2</sup> and the Australian National Health and Medical Research Council guidelines, which provided the most current ethical principles for medical research involving human subjects. Subjects were informed about the nature and risks of the protocol, provided consent to participate without coercion, and were free to refuse participation or withdraw at any time; participation did not influence medical treatment, with both groups receiving the standard of medical care available at the time in addition to the dietary intervention. There were no interim analyses or stopping guidelines in place. The NIH Office of Human Research Protection reviewed these conditions and determined that these de-identified data were suitable for the current analyses (OHSR exemption #5744).

#### IV. Webfigure 2: Sydney Diet Heart Study procedure flow diagram

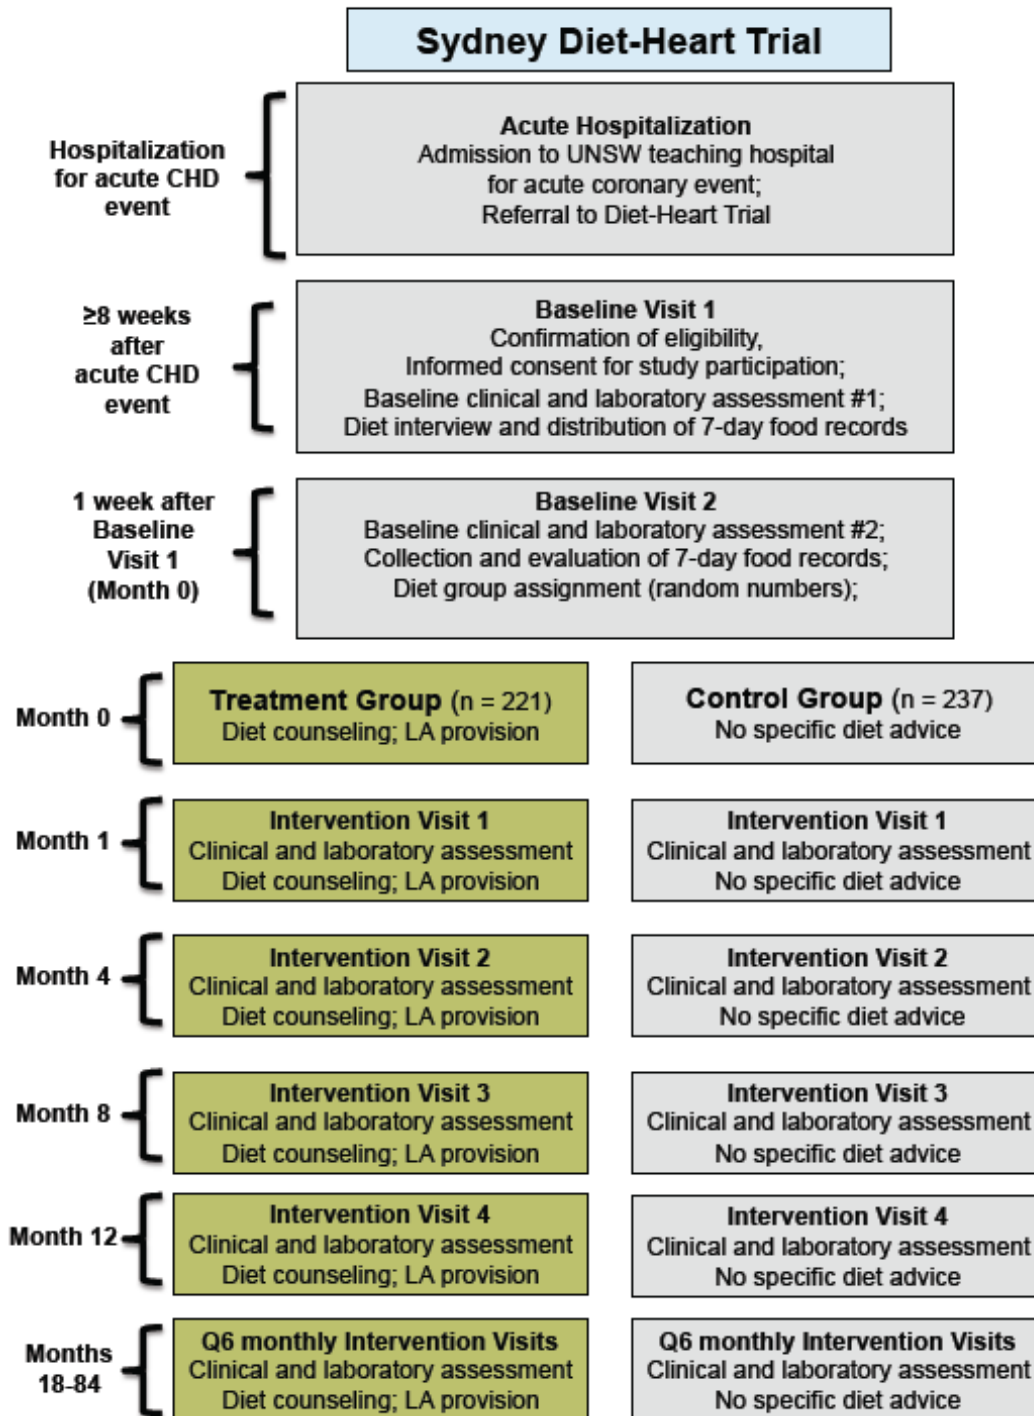

UNSW=University of New South Wales. CHD=coronary heart disease. LA=linoleic acid.

## V. Webtable 2: Longitudinal Changes in PUFA, SFA and the PUFA to SFA ratio

| Longitudinal PUFA intake       |             |            |             |            |             |            |             |            |             |            |             |            |             |            |             |            |             |            |             |            |             |            |             |            |
|--------------------------------|-------------|------------|-------------|------------|-------------|------------|-------------|------------|-------------|------------|-------------|------------|-------------|------------|-------------|------------|-------------|------------|-------------|------------|-------------|------------|-------------|------------|
| Diet Group                     | Baseline    |            | Month 4     |            | Month 8     |            | Month 12    |            | Month 18    |            | Month 24    |            | Month 30    |            | Month 36    |            | Month 42    |            | Month 48    |            | Month 54    |            | Month 60    |            |
|                                | $\mu_{1/2}$ | IQR        |
| Safflower                      |             |            |             |            |             |            |             |            |             |            |             |            |             |            |             |            |             |            |             |            |             |            |             |            |
| PUFA en%                       | 6.1         | 3.1, 9.1   | 15.9        | 12.6, 19.0 | 15.7        | 12.2, 18.8 | 15.         | 12.1, 19.2 | 15.3        | 11.9, 18.4 | 14.9        | 10.9, 18.1 | 15.4        | 12.2, 18.4 | 16.1        | 12.0, 18.5 | 15.5        | 11.7, 18.8 | 15.5        | 12.1, 18.9 | 16.4        | 12.6, 18.6 | 15.0        | 13.3, 16.6 |
| N                              |             | 205        |             | 200        |             | 181        |             | 157        |             | 143        |             | 123        |             | 107        |             | 82         |             | 70         |             | 49         |             | 30         |             | 25         |
| Control                        |             |            |             |            |             |            |             |            |             |            |             |            |             |            |             |            |             |            |             |            |             |            |             |            |
| PUFA en%                       | 6.3         | 3.3, 9.2   | 8.1         | 5.6, 9.9   | 8.5         | 6.2, 11.4  | 8.6         | 6.2, 11.9  | 9.1         | 6.4, 11.3  | 9.0         | 6.4, 12.0  | 8.8         | 6.8, 11.3  | 9.1         | 6.3, 11.7  | 8.8         | 6.3, 11.4  | 9.4         | 6.6, 11.7  | 9.1         | 6.3, 12.7  | 10.2        | 7.6, 12.8  |
| N                              |             | 221        |             | 217        |             | 196        |             | 171        |             | 162        |             | 146        |             | 127        |             | 99         |             | 90         |             | 59         |             | 40         |             | 24         |
| $\mu_{1/2}$ Difference         |             | -0.1       |             | +7.9       |             | +7.2       |             | +6.9       |             | +6.2       |             | +5.9       |             | +6.6       |             | +7.0       |             | +6.7       |             | +6.2       |             | +7.3       |             | +4.8       |
| P-diff                         |             | 0.74       |             | < 0.01     |             | < 0.01     |             | < 0.01     |             | < 0.01     |             | < 0.01     |             | < 0.01     |             | < 0.01     |             | < 0.01     |             | < 0.01     |             | < 0.01     |             | < 0.01     |
| Longitudinal SFA intake        |             |            |             |            |             |            |             |            |             |            |             |            |             |            |             |            |             |            |             |            |             |            |             |            |
| Diet Group                     | Baseline    |            | Month 4     |            | Month 8     |            | Month 12    |            | Month 18    |            | Month 24    |            | Month 30    |            | Month 36    |            | Month 42    |            | Month 48    |            | Month 54    |            | Month 60    |            |
|                                | $\mu_{1/2}$ | IQR        |
| Safflower                      |             |            |             |            |             |            |             |            |             |            |             |            |             |            |             |            |             |            |             |            |             |            |             |            |
| SFA en%                        | 16.2        | 13.5, 19.4 | 8.7         | 7.5, 10.5  | 9.0         | 7.8, 10.5  | 8.7         | 7.6, 11.0  | 8.6         | 7.6, 11.1  | 9.5         | 8.0, 11.3  | 9.3         | 8.2, 11.8  | 9.9         | 8.3, 11.4  | 10.5        | 8.7, 12.6  | 9.3         | 8.3, 11.2  | 10.2        | 8.2, 12.3  | 9.8         | 8.4, 12.6  |
| N                              |             | 205        |             | 200        |             | 181        |             | 157        |             | 143        |             | 123        |             | 107        |             | 82         |             | 70         |             | 49         |             | 30         |             | 25         |
| Control                        |             |            |             |            |             |            |             |            |             |            |             |            |             |            |             |            |             |            |             |            |             |            |             |            |
| SFA en %                       | 15.6        | 13.0, 18.7 | 13.6        | 11.3, 16.2 | 13.3        | 11.3, 16.1 | 13.4        | 10.4, 15.7 | 13.7        | 10.5, 16.1 | 13.4        | 10.9, 15.6 | 13.2        | 10.9, 15.8 | 13.1        | 10.6, 15.3 | 13.4        | 11.7, 15.4 | 13.2        | 10.1, 15.6 | 13.1        | 11.6, 15.4 | 12.8        | 11.9, 15.7 |
| N                              |             | 221        |             | 217        |             | 196        |             | 171        |             | 162        |             | 146        |             | 127        |             | 99         |             | 90         |             | 59         |             | 40         |             | 24         |
| $\mu_{1/2}$ Difference         |             | +0.6       |             | -5.0       |             | -4.3       |             | -4.7       |             | -5.0       |             | -3.9       |             | -3.9       |             | -3.2       |             | -2.9       |             | -3.9       |             | -2.9       |             | -2.9       |
| P-diff                         |             | 0.27       |             | < 0.01     |             | < 0.01     |             | < 0.01     |             | < 0.01     |             | < 0.01     |             | < 0.01     |             | < 0.01     |             | < 0.01     |             | < 0.01     |             | < 0.01     |             | < 0.01     |
| Longitudinal PUFA to SFA ratio |             |            |             |            |             |            |             |            |             |            |             |            |             |            |             |            |             |            |             |            |             |            |             |            |
| Diet Group                     | Baseline    |            | Month 4     |            | Month 8     |            | Month 12    |            | Month 18    |            | Month 24    |            | Month 30    |            | Month 36    |            | Month 42    |            | Month 48    |            | Month 54    |            | Month 60    |            |
|                                | $\mu_{1/2}$ | IQR        |
| Safflower                      |             |            |             |            |             |            |             |            |             |            |             |            |             |            |             |            |             |            |             |            |             |            |             |            |
| P to S                         | 0.38        | 0.16, 0.65 | 1.85        | 1.37, 2.42 | 1.78        | 1.33, 2.29 | 1.8         | 1.22, 2.21 | 1.74        | 1.17, 2.22 | 1.65        | 1.12, 2.11 | 1.66        | 1.14, 2.10 | 1.65        | 1.18, 2.05 | 1.51        | 1.03, 1.97 | 1.57        | 1.16, 2.36 | 1.66        | 1.12, 2.04 | 1.51        | 1.07, 2.02 |
| N                              |             | 205        |             | 200        |             | 181        |             | 157        |             | 143        |             | 123        |             | 107        |             | 82         |             | 70         |             | 49         |             | 30         |             | 25         |
| Control                        |             |            |             |            |             |            |             |            |             |            |             |            |             |            |             |            |             |            |             |            |             |            |             |            |
| P to S                         | 0.41        | 0.18, 0.68 | 0.58        | 0.40, 0.81 | 0.64        | 0.41, 0.95 | 0.6         | 0.43, 1.01 | 0.65        | 0.42, 0.97 | 0.69        | 0.45, 0.93 | 0.64        | 0.43, 1.05 | 0.67        | 0.43, 1.04 | 0.61        | 0.43, 0.98 | 0.70        | 0.52, 0.99 | 0.69        | 0.41, 1.07 | 0.76        | 0.60, 0.97 |
| N                              |             | 221        |             | 217        |             | 196        |             | 171        |             | 162        |             | 146        |             | 127        |             | 99         |             | 90         |             | 59         |             | 40         |             | 24         |
| $\mu_{1/2}$ Difference         |             | +0.03      |             | +1.28      |             | +1.14      |             | +1.17      |             | +1.09      |             | +0.97      |             | +1.01      |             | +0.98      |             | +0.89      |             | +0.87      |             | +0.96      |             | +0.75      |
| P-diff                         |             | 0.51       |             | < 0.01     |             | < 0.01     |             | < 0.01     |             | < 0.01     |             | < 0.01     |             | < 0.01     |             | < 0.01     |             | < 0.01     |             | < 0.01     |             | < 0.01     |             | < 0.01     |

$\mu_{1/2}$  = Median. IQR=inter-quartile range (25%, 75%). PUFA=polyunsaturated fatty acid. SFA=saturated fatty acids. en%= percentage of energy

### VI. Webtable 3: Subgroup analyses in the Sydney Diet Heart Study

| Subgroup                                  | Risk of death |      |            |      |
|-------------------------------------------|---------------|------|------------|------|
|                                           | n             | HR   | 95% CI     | p    |
| <b>Age (years)</b>                        |               |      |            |      |
| < 50                                      | 236           | 2.24 | 1.04, 4.83 | 0.04 |
| ≥ 50                                      | 222           | 1.28 | 0.67, 2.43 | 0.44 |
| <b>Serum Cholesterol (mg/dl)</b>          |               |      |            |      |
| < 260                                     | 166           | 1.95 | 0.67, 2.43 | 0.17 |
| ≥ 260                                     | 292           | 1.51 | 0.86, 2.67 | 0.15 |
| <b>Body Mass Index (kg/m<sup>2</sup>)</b> |               |      |            |      |
| < 25                                      | 216           | 1.89 | 0.86, 4.15 | 0.11 |
| ≥ 25                                      | 242           | 1.47 | 0.79, 2.75 | 0.27 |
| <b>Acute coronary event type*</b>         |               |      |            |      |
| Myocardial infarction                     | 395           | 1.65 | 0.97, 2.80 | 0.07 |
| Acute angina or coronary insufficiency    | 63            | 1.60 | 0.48, 5.25 | 0.44 |
| <b>Smoking Status*</b>                    |               |      |            |      |
| Yes                                       | 321           | 2.09 | 1.08, 4.02 | 0.03 |
| No                                        | 137           | 1.18 | 0.56, 2.47 | 0.67 |
| <b>Alcohol Use* (kcal/d)</b>              |               |      |            |      |
| Moderate/heavy (>200)                     | 170           | 2.89 | 1.10, 7.58 | 0.03 |
| Light (<200)                              | 164           | 2.63 | 1.06, 6.53 | 0.04 |
| None                                      | 124           | 0.68 | 0.31, 1.52 | 0.35 |

Hazard ratios and 95% confidence intervals for the LA intervention group as compared to the control group are shown.

\*Assessed at acute hospitalization. BMI=body mass index. P values for interactions of the LA intervention and subgroup variables were non-significant ( $p>0.15$ ), except for alcohol use ( $p=0.03$ ).

#### Subgroup Analyses

Subgroup analyses were performed based on age, baseline serum cholesterol, BMI, acute coronary diagnostic category, smoking status and alcohol use at hospitalization (**Webtable 3**). Only alcohol use significantly modified the relationship of the LA intervention to the risk of death from all causes ( $p=0.03$ ). The likelihood ratio test p value was  $>0.15$  for all other tested variables. Among subjects reporting alcohol consumption at hospitalization, randomization to the LA intervention group was associated with a 2 to 3-fold higher risk of death from all causes, however there was no relationship among non-drinkers. Among the other subgroups, results were directionally concordant with the overall finding of increased risk of death in the LA intervention group, although the confidence intervals were wide and the effects were not uniformly significant. These subgroup analyses should be interpreted with some caution because there was no evidence of effect modification.

## VII. Webtable 4: Mortality outcomes according to longitudinal changes in dietary fatty acid intake, with missing data imputation

| Diet Variable                                     | Model§ | Mortality                |       |                          |       |                          |       |
|---------------------------------------------------|--------|--------------------------|-------|--------------------------|-------|--------------------------|-------|
|                                                   |        | All-cause                |       | Cardiovascular disease   |       | Coronary heart disease   |       |
|                                                   |        | Hazard Ratio<br>(95% CI) | P     | Hazard Ratio<br>(95% CI) | P     | Hazard Ratio<br>(95% CI) | P     |
| <b>LA intervention group only</b><br>(n=221)*     |        |                          |       |                          |       |                          |       |
| <b>PUFA (LA-specific)</b><br>(per 5 en% increase) | 1      | 1.33 (1.03 to 1.72)      | 0.03  | 1.38 (1.07 to 1.79)      | 0.01  | 1.23(0.94 to 1.61)       | 0.14  |
|                                                   | 2      | 1.30 (1.02 to 1.67)      | 0.04  | 1.35 (1.05 to 1.74)      | 0.02  | 1.22 (0.94 to 1.60)      | 0.14  |
| <b>SFA</b><br>(per 5 en% increase)                | 1      | 0.74 (0.51 to 1.07)      | 0.11  | 0.74 (0.51 to 1.08)      | 0.12  | 0.72 (0.49 to 1.06)      | 0.09  |
|                                                   | 2      | 0.78 (0.54 to 1.12)      | 0.18  | 0.78 (0.54 to 1.30)      | 0.19  | 0.74 (0.50 to 1.09)      | 0.13  |
| <b>LA to SFA Ratio</b><br>(per 1 unit increase)   | 1      | 1.56 (1.06 to 2.37)      | 0.03  | 1.63 (1.09 to 2.44)      | 0.02  | 1.49 (0.98 to 2.25)      | 0.06  |
|                                                   | 2      | 1.59 (1.01 to 2.36)      | 0.02  | 1.65 (1.10 to 2.48)      | 0.02  | 1.52 (1.00 to 2.31)      | 0.05  |
| <b>Control group only (n=237†)</b>                |        |                          |       |                          |       |                          |       |
| <b>PUFA (unspecified)</b><br>(per 5 en% increase) | 1      | 1.09 (0.70 to 1.69)      | 0.70  | 1.08 (0.69 to 1.70)      | 0.74  | 1.01 (0.62 to 1.64)      | 0.98  |
|                                                   | 2      | 1.11 (0.73 to 1.67)      | 0.64  | 1.10 (0.71 to 1.68)      | 0.67  | 1.02 (0.64 to 1.62)      | 0.93  |
| <b>SFA</b><br>(per 5 en% increase)                | 1      | 0.76 (0.47 to 1.24)      | 0.27  | 0.89 (0.53 to 1.48)      | 0.65  | 0.98 (0.57 to 1.68)      | 0.93  |
|                                                   | 2      | 0.75 (0.47 to 1.20)      | 0.23  | 0.85 (0.52 to 1.40)      | 0.53  | 0.95 (0.56 to 1.59)      | 0.84  |
| <b>PUFA to SFA Ratio</b><br>(per 1 unit increase) | 1      | 0.84 (0.38 to 1.85)      | 0.67  | 0.77 (0.35 to 1.73)      | 0.53  | 0.55 (0.26 to 1.17)      | 0.12  |
|                                                   | 2      | 1.06 (0.56 to 2.01)      | 0.86  | 1.00 (0.52 to 1.97)      | 0.98  | 0.77 (0.39 to 1.53)      | 0.46  |
| <b>Whole sample (n=458)‡</b>                      |        |                          |       |                          |       |                          |       |
| <b>PUFA(unspecified)</b><br>(per 5 en% increase)  | 1      | 1.30 (1.08 to 1.57)      | <0.01 | 1.34 (1.11 to 1.62)      | <0.01 | 1.25 (1.02 to 1.53)      | 0.03  |
|                                                   | 2      | 1.34 (1.12 to 1.61)      | <0.01 | 1.38 (1.15 to 1.66)      | <0.01 | 1.29 (1.06 to 1.58)      | 0.01  |
| <b>SFA</b><br>(per 5 en% increase)                | 1      | 0.70 (0.54 to 0.92)      | 0.01  | 0.73 (0.55 to 0.96)      | 0.02  | 0.73 (0.88 to 0.98)      | 0.01  |
|                                                   | 2      | 0.67 (0.51 to 0.87)      | <0.01 | 0.69 (0.52 to 0.90)      | <0.01 | 0.69 (0.52 to 0.92)      | 0.01  |
| <b>PUFA to SFA Ratio</b><br>(per 1 unit increase) | 1      | 1.43 (1.08 to 1.89)      | 0.01  | 1.48 (1.11 to 1.87)      | <0.01 | 1.36 (1.01 to 1.84)      | 0.04  |
|                                                   | 2      | 1.60 (1.20 to 2.13)      | <0.01 | 1.65 (1.24 to 2.21)      | <0.01 | 1.52 (1.12 to 2.06)      | <0.01 |

En%=percentage of food energy. Missing baseline and follow-up diet data were imputed for 32 subjects missing baseline and/or follow-up diet data.. LA=linoleic acid. PUFA=polyunsaturated fatty acids. SFA=saturated fatty acids.

\*No. of deaths 39 (all cause), 38 (cardiovascular), 36 (coronary heart disease).

†No. of deaths 28 (all cause), 26 (cardiovascular), 24 (coronary heart disease).

‡No. of deaths 67 (all cause), 64 (cardiovascular), 60 (coronary heart disease).

§Model 1: crude. Model 2: adjusted for age, dietary cholesterol intake, baseline BMI, smoking, alcohol use, and marital status

### Sensitivity Analysis

The analysis presented in Table 5 of the main paper excludes 29 subjects (23 subjects missing all diet data and 6 with follow-up but not baseline data). Among these subjects, there were a disproportionate number of deaths in the LA intervention group (4 CHD deaths among 15 subjects with missing data) compared to the control group (0 deaths out of 14 with missing data). Since these data were not missing at random, we conducted a sensitivity analysis imputing missing diet data for these 29 subjects. For baseline, we used the median values for the whole sample; for follow-up, we used the median values of their respective diet group. This analysis found slightly stronger and more precise associations between increases in n-6 LA and higher mortality.



## VIII. PUFA intervention meta-analysis methods and results

We conducted a systematic review and meta-analysis of the effects of PUFA interventions on CHD risk in 2010<sup>3</sup>. However, this analysis was incomplete because the CHD and CVD mortality outcomes of the SDHS were not previously available. Recovery of these missing data has permitted a more comprehensive meta-analysis of the effects of LA-selective, mixed n-3/n-6, and unspecified PUFA intervention RCTs on CHD and CVD risk. Detailed descriptions of our literature search methods and inclusion and exclusion criteria have been previously published<sup>3</sup>. In brief, we identified RCT datasets in which PUFAs were increased in place of SFA and relevant mortality outcomes were recorded (**Webtable 5**). We then extracted the number of participants in the experimental and control groups with and without the following outcomes: (1) CHD death, (2) CVD death, and (3) total deaths. We extracted food and nutrient composition data for the experimental intervention and control diet. PUFA interventions were classified as either 'LA-selective' or 'mixed n-3/n-6 PUFA' (i.e. n-3 plus n-6 PUFA) on the basis of quantitative dietary fatty acid data and/or the specific study oils that were provided to experimental dieters (**Webtable 6**). Datasets were included if PUFAs were increased in place of SFA and CHD deaths, CVD deaths, and/or total deaths were reported. Datasets were excluded if: (1) individual participants were not randomly assigned to the experimental diet or a control diet, or (2) the dietary information necessary to classify PUFA interventions as either 'LA-selective' or 'mixed n-3/n-6' was not available.

Nine RCTs were identified, however the Finnish Mental Health Study<sup>4</sup> was excluded because patients were assigned by hospital and not randomized as individual patients, and the cardiotoxic medication thioridazine was used disproportionately in one study arm (reviewed in<sup>3</sup>). The Diet And Re-infarction Trial (DART)<sup>5</sup> was excluded from the main analyses because the dietary information necessary to definitively classify the PUFA intervention as either 'LA-selective' or 'mixed n-3/n-6' was not available. Because specific study oils were not provided, it is likely, but not definite, that the PUFA intervention group increased both n-6 LA and n-3 PUFAs. Therefore, DART was included provisionally as a mixed n-3/n-6 PUFA RCT in an exploratory sensitivity analysis. The remaining 7 RCTs (8 datasets, 11,275 participants) were included in the main analyses. Omega-6 LA was selectively increased, without concurrent increase in n-3 PUFAs, in 4 of 8 datasets. Omega-3 PUFAs were substantially increased in 4 of 8 datasets. A detailed description of the PUFA composition and identification of study oils was previously published, and is summarized in **Webtable 6**. Five of 8 datasets were secondary CHD prevention trials. Six datasets had mean follow-up of at least 18 months. Seven datasets assessed men.

**Webtable 5: General characteristics of randomized controlled PUFA intervention trials**

| Study                                           | Group        | N             | Population                                  | Blinding | Follow-up | CHD deaths | CVD deaths  | Total Deaths |
|-------------------------------------------------|--------------|---------------|---------------------------------------------|----------|-----------|------------|-------------|--------------|
| Minnesota Coronary (men) <sup>6-11</sup>        | Intervention | 2197          | Institutionalized men with or without CHD   | Double   | ≤ 4.5 y*  | 39         | 52          | 158          |
|                                                 | Control      | 2196          |                                             |          |           | 34         | 45          | 153          |
| Minnesota Coronary (women) <sup>6-11</sup>      | Intervention | 2344          | Institutionalized women with or without CHD | Double   | ≤ 4.5 y*  | 22         | 31          | 111          |
|                                                 | Control      | 2320          |                                             |          |           | 20         | 30          | 95           |
| Sydney Diet-Heart <sup>12-16</sup>              | Intervention | 221           | Ambulatory men with CHD                     | Single   | ≤ 7 y     | 36         | 38          | 39           |
|                                                 | Control      | 237           |                                             |          |           | 24         | 26          | 28           |
| Rose Corn Oil <sup>17</sup>                     | Intervention | 28            | Ambulatory men with CHD                     | Single   | 2 y       | 5          | 5           | 5            |
|                                                 | Control      | 26            |                                             |          |           | 1          | 1           | 1            |
| Oslo Diet-Heart <sup>18 19</sup>                | Intervention | 206           | Ambulatory men with CHD                     | Single   | 5 y       | 37         | 38          | 41           |
|                                                 | Control      | 206           |                                             |          |           | 50         | 52          | 55           |
| St. Thomas Atherosclerosis <sup>20-22</sup>     | Intervention | 27            | Ambulatory men with CHD                     | Single   | 3-3 y     | 1          | 1           | 1            |
|                                                 | Control      | 28            |                                             |          |           | 3          | 3           | 3            |
| Los Angeles Veterans <sup>23-34</sup>           | Intervention | 424           | Institutionalized men with or without CHD   | Double   | ≤ 8 y     | 42         | 44          | 174          |
|                                                 | Control      | 422           |                                             |          |           | 51         | 59          | 178          |
| Medical Research Council Soy <sup>35 36</sup>   | Intervention | 199           | Ambulatory men with CHD                     | Single   | ≤ 7 y     | 25         | 27          | 28           |
|                                                 | Control      | 194           |                                             |          |           | 25         | 25          | 31           |
| Diet and Re-infarction Trial <sup>5 37-41</sup> | Intervention | 1018          | Ambulatory men with CHD                     | Single   | 2 y       | 35         | NA†         | 111          |
|                                                 | Control      | 1015          |                                             |          |           | 47         |             | 113          |
| <b>Totals</b>                                   |              | <b>13,308</b> |                                             |          |           | <b>497</b> | <b>477†</b> | <b>1325</b>  |

CHD=coronary heart disease. CVD=cardiovascular disease. \*Mean follow-up <18 months. All other trials were >18 months. †Does not include CVD deaths for the Diet and Re-infarction Trial (not reported).

**Webtable 6: Dietary characteristics of randomized controlled PUFA intervention trials**

| Study                                 | Group        | Oil                     | Percentage of energy |          |         |                | PUFA Intervention    | Inclusion |
|---------------------------------------|--------------|-------------------------|----------------------|----------|---------|----------------|----------------------|-----------|
|                                       |              |                         | LA                   | ALA      | EPA+DHA |                |                      |           |
| Minnesota Coronary<br>(men and women) | Intervention | Corn                    | 14.2                 | very low | U       | LA-selective   | Yes                  |           |
|                                       | Control      |                         | ~5.0                 | U        | U       |                |                      |           |
| Sydney Diet-Heart                     | Intervention | Safflower               | ~15.0                | very low | U       | LA-selective   | Yes                  |           |
|                                       | Control      |                         | ~8.0                 | U        | U       |                |                      |           |
| Rose Corn Oil                         | Intervention | Corn                    | +14.9 <sup>†</sup>   | very low | U       | LA-selective   | Yes                  |           |
|                                       | Control      |                         | U                    | U        | U       |                |                      |           |
| Oslo Diet-Heart                       | Intervention | Soybean, Cod Liver Oil  | 15.6                 | 2.7      | 2.0     | Mixed n-3/n-6  | Yes                  |           |
|                                       | Control      |                         | 3.3                  | U        | low     |                |                      |           |
| St. Thomas Atherosclerosis            | Intervention | U                       | 5.6                  | 0.32     | 0.21    | Mixed n-3/n-6  | Yes                  |           |
|                                       | Control      |                         | 4.0                  | 0.41     | 0.10    |                |                      |           |
| Los Angeles Veterans                  | Intervention | Mostly Corn and Soybean | 14.8                 | 0.7      | low     | Mixed n-3/n-6  | Yes                  |           |
|                                       | Control      |                         | 4.8                  | <0.1     | low     |                |                      |           |
| Medical Research Council<br>Soy       | Intervention | Soybean                 | 16.3                 | 2.3      | U       | Mixed n-3/n-6  | Yes                  |           |
|                                       | Control      |                         | U                    | U        | U       |                |                      |           |
| Diet and Re-infarction Trial*         | Intervention | U                       | U                    | U        | U       | Mixed n-3/n-6* | Sensitivity analysis |           |
|                                       | Control      |                         | U                    | U        | U       |                |                      |           |

1 4-6 13-22 24-34 36 38-52

LA-selective PUFA interventions selectively increased n-6 LA without a concurrent increase in n-3 PUFAs. Mixed n-3/n-6 PUFA interventions increased n-3 PUFAs and n-6 LA. LA=linoleic acid (18:2n-6). ALA=alpha linolenic acid (18:3n-3). EPA=eicosapentaenoic acid (20:5n-3). DHA=docosahexaenoic acid (22:6n-3). PUFA=polyunsaturated fatty acid. en%= percentage of energy. \*Excluded from main analysis because n-6 and n-3 PUFA data are unavailable. Total unspecified PUFAs increased by 2.8 en% from 6.9 to 9.7 en%.

<sup>†</sup>Corn oil supplied an additional 14.9 en% as n-6 LA, however total LA intake was unspecified.

## **Statistical methods for meta-analyses**

Meta-analyses were performed for the LA-selective and mixed n-3/n-6 PUFA intervention datasets with calculated hazard ratios (HR) and 95% confidence intervals and p-values for each of the following outcomes: (1) CHD death, (2) CVD death, and (3) total deaths. For RCTs that did not report HRs, calculated risk ratios and 95% confidence intervals were used as the best available estimate. Fixed effects models were applied to each classification set. A test of heterogeneity was performed to determine whether the effects of LA-selective and mixed n-3/n-6 PUFA intervention datasets should be evaluated separately. Potential for publication bias was assessed by visual inspection of a funnel plot of the treatment effect versus standard error (**Webfigure 3**). Sensitivity analyses were performed to evaluate whether results were substantially altered based on specific RCT characteristics. Statistical analyses were performed using Stata version 11.2 (Stata Corporation, College Station, TX, 2009).

**Webfigure 3: Funnel plot assessment for publication bias (all-cause mortality)**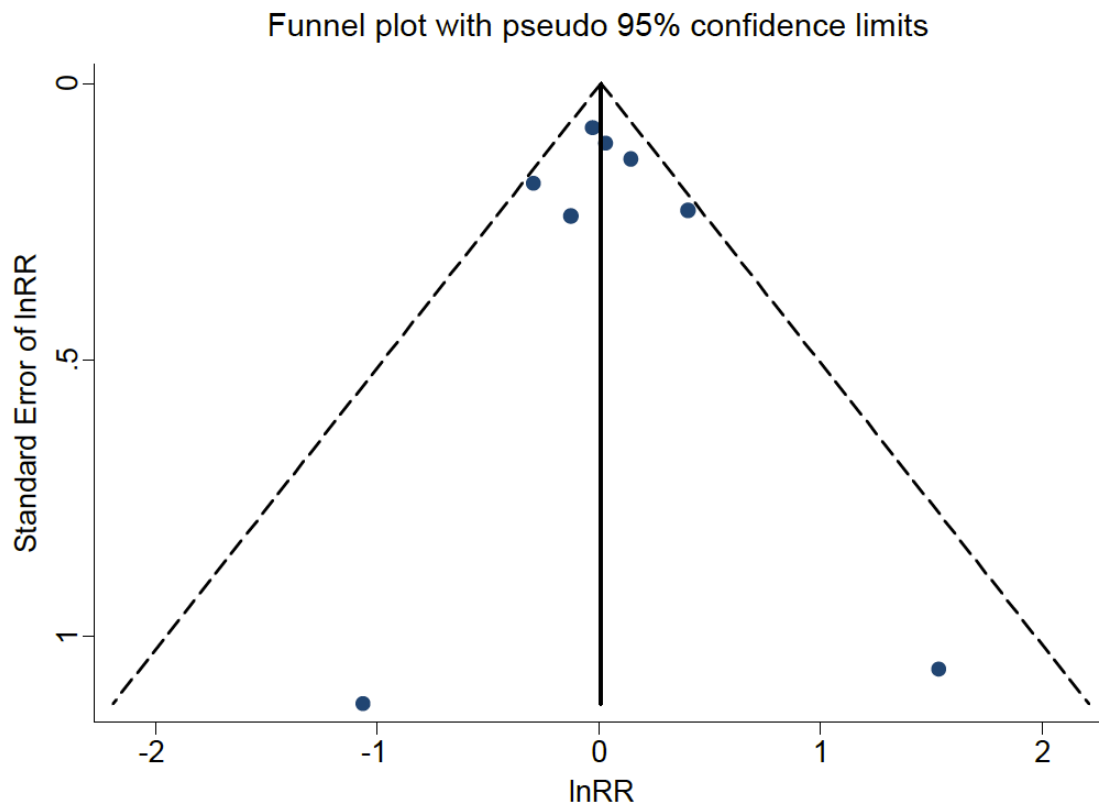

Funnel plots of treatment effect versus standard error on a natural log scale for all-cause, CVD and CHD mortality were fairly symmetrical, minimizing concern about publication bias.

**Webtable 7: Effects of LA-selective and mixed n-3/n-6 PUFA interventions on CHD, CVD and all-cause mortality in RCTs**

| Study name                                              | CHD death |               |       | CVD death |               |       | All deaths |               |       |
|---------------------------------------------------------|-----------|---------------|-------|-----------|---------------|-------|------------|---------------|-------|
|                                                         | HR        | 95% CI        | p     | HR        | 95% CI        | p     | HR         | 95% CI        | p     |
| <b>Individual LA-selective PUFA interventions</b>       |           |               |       |           |               |       |            |               |       |
| Minnesota CS (men)                                      | 1.15      | (0.73, 1.81)  | 0.56  | 1.16      | (0.78, 1.71)  | 0.47  | 1.03       | (0.83, 1.28)  | 0.77  |
| Minnesota CS (women)                                    | 1.09      | (0.60, 1.99)  | 0.78  | 1.02      | (0.62, 1.68)  | 0.93  | 1.16       | (0.89, 1.51)  | 0.29  |
| Sydney Diet-Heart                                       | 1.74      | (1.04, 2.91)  | 0.04* | 1.70      | (1.03-2.80)   | 0.04* | 1.62       | (1.00, 2.64)  | 0.051 |
| Rose Corn Oil                                           | 4.64      | (0.58, 37.15) | 0.15  | 4.64      | (0.58, 37.15) | 0.15  | 4.64       | (0.58, 37.15) | 0.15  |
| <b>Pooled LA-selective PUFA interventions</b>           |           |               |       |           |               |       |            |               |       |
| All datasets (n=4)                                      | 1.33      | (0.99, 1.79)  | 0.056 | 1.27      | (0.98, 1.65)  | 0.07  | 1.14       | (0.97, 1.33)  | 0.11  |
| Secondary prevention (n=2)                              | 1.84      | (1.11, 3.04)  | 0.02* | 1.80      | (1.11, 2.92)  | 0.02* | 1.71       | (1.07, 2.75)  | 0.03* |
| Male (n=3)                                              | 1.42      | (1.01, 1.99)  | 0.04* | 1.38      | (1.02, 1.87)  | 0.04* | 1.13       | (0.93, 1.37)  | 0.24  |
| > 18 months mean diet exposure (n=2)                    | 1.84      | (1.11, 3.04)  | 0.02* | 1.80      | (1.11, 2.92)  | 0.02* | 1.71       | (1.07, 2.75)  | 0.03* |
| <b>Mixed n-3/n-6 PUFA interventions</b>                 |           |               |       |           |               |       |            |               |       |
| Oslo Diet-Heart                                         | 0.74      | (0.51, 1.08)  | 0.12  | 0.73      | (0.50, 1.06)  | 0.10  | 0.75       | (0.52, 1.06)  | 0.11  |
| St. Thomas Atherosclerosis                              | 0.35      | (0.04, 3.12)  | 0.34  | 0.35      | (0.04, 3.12)  | 0.34  | 0.35       | (0.04, 3.12)  | 0.34  |
| Los Angeles Veterans                                    | 0.82      | (0.56, 1.21)  | 0.31  | 0.74      | (0.51, 1.07)  | 0.11  | 0.97       | (0.83, 1.14)  | 0.74  |
| Medical Research Council Soy                            | 0.98      | (0.58, 1.64)  | 0.92  | 1.05      | (0.63, 1.75)  | 0.84  | 0.88       | (0.55, 1.41)  | 0.60  |
| Diet and Re-infarction Trial                            | 0.74      | (0.48, 1.14)  | 0.17  |           | NA            |       | 0.98       | (0.76, 1.25)  | 0.87  |
| <b>Pooled mixed n-3/n-6 PUFA interventions</b>          |           |               |       |           |               |       |            |               |       |
| All datasets (n=4)                                      | 0.81      | (0.64, 1.03)  | 0.08  | 0.79      | (0.63, 0.99)  | 0.04* | 0.92       | (0.80, 1.06)  | 0.25  |
| Secondary prevention (n=3)                              | 0.80      | (0.59, 1.09)  | 0.15  | 0.82      | (0.61, 1.10)  | 0.18  | 0.78       | (0.59, 1.04)  | 0.09  |
| Male (n=4)                                              | 0.81      | (0.64, 1.03)  | 0.08  | 0.79      | (0.63, 0.99)  | 0.04* | 0.92       | (0.80, 1.06)  | 0.25  |
| > 18 months mean diet exposure (n=4)                    | 0.81      | (0.64, 1.03)  | 0.08  | 0.79      | (0.63, 0.99)  | 0.04* | 0.92       | (0.80, 1.06)  | 0.25  |
| All datasets with DART included (n=5)                   | 0.79      | (0.64, 0.98)  | 0.03* |           | NA            |       | 0.94       | (0.83, 1.06)  | 0.28  |
| <b>Pooling with no distinction between PUFA species</b> |           |               |       |           |               |       |            |               |       |
| All datasets (n=8)                                      | 0.98      | (0.82, 1.18)  | 0.87  | 0.97      | (0.82, 1.15)  | 0.74  | 1.01       | (0.91, 1.12)  | 0.85  |
| Secondary prevention (n=5)                              | 1.00      | (0.77, 1.30)  | 0.99  | 1.01      | (0.79, 1.31)  | 0.92  | 0.96       | (0.75, 1.22)  | 0.73  |
| Male (n=7)                                              | 0.98      | (0.80, 1.18)  | 0.80  | 0.96      | (0.80, 1.16)  | 0.70  | 0.99       | (0.88, 1.10)  | 0.81  |
| > 18 months mean diet exposure (n=6)                    | 0.94      | (0.76, 1.17)  | 0.98  | 0.92      | (0.75, 1.13)  | 0.95  | 0.97       | (0.85, 1.11)  | 0.64  |
| All datasets with DART included (n=5)                   | 0.90      | (0.76-1.06)   | 0.21  |           | NA            |       | 1.01       | (0.91, 1.11)  | 0.91  |

**Abbreviations:** CHD=coronary heart disease; CVD=cardiovascular disease; HR=hazard ratio; CI=confidence interval; p=p value; NA=Not available; \* indicates  $p < 0.05$ .

### **LA-selective PUFA interventions**

Among the four datasets that selectively increased n-6 LA in place of SFA, the pooled risk for CHD death increased by 33% [HR 1.33 (0.993, 1.79) p=0.056] and 27% (HR 1.27 (0.98, 1.65) p=0.07], respectively (**Webtable 7**). In sensitivity analyses limiting the sample to the two secondary CHD prevention trials and/or mean follow-up >18 months, the pooled risks for CHD death [1.84 (1.11-3.04) p=0.02] and CVD death [1.80 (1.11-2.92) p=0.02] were significantly increased.

### **Mixed n-3/n-6 PUFA interventions**

Among the four datasets using mixed n-3/n-6 PUFA interventions, the pooled risk of CVD death was reduced by 21% [HR 0.79 (0.62-0.99) p=0.04] (**Webtable 7**). In a sensitivity analysis including DART, the pooled risk for CHD death was also significantly reduced [HR 0.79 (0.64, 0.98) p=0.03].

**Webtable 9: LA-selective and mixed n-3/n-6 PUFA interventions have heterogeneous effects**

| Outcome        | Main analysis |                    |       | Including DART |       |       | Secondary prevention |       |       | Men       |       |       | > 18months |       |       |
|----------------|---------------|--------------------|-------|----------------|-------|-------|----------------------|-------|-------|-----------|-------|-------|------------|-------|-------|
|                | $Q_{bet}$     | p                  | $I^2$ | $Q_{bet}$      | p     | $I^2$ | $Q_{bet}$            | p     | $I^2$ | $Q_{bet}$ | p     | $I^2$ | $Q_{bet}$  | p     | $I^2$ |
| CHD death      |               |                    |       |                |       |       |                      |       |       |           |       |       |            |       |       |
| LA-selective   | 3.2           | 0.4                | 7.5%  | 1.8            | 0.6   | 0.0%  | 0.8                  | 0.4   | 0.0%  | 2.7       | 0.3   | 25.2% | 0.8        | 0.4   | 0.0%  |
| Mixed n-3/n-6  | 1.3           | 0.7                | 0.0%  | 1.4            | 0.8   | 0.0%  | 1.3                  | 0.5   | 0.0%  | 1.3       | 0.7   | 0.0%  | 1.3        | 0.7   | 0.0%  |
| Combined group | 11.2          | 0.1                | 37.7% | 7.2            | 0.5   | 0.0%  | 9.8                  | 0.04  | 58.2% | 11.1      | 0.09  | 46.0% | 10.5       | 0.06  | 52.4% |
| Between group  | 6.7           | 0.01               |       | 4.0            | 0.04  |       | 7.7                  | 0.005 |       | 7.2       | 0.008 |       | 8.4        | 0.004 |       |
| CVD death      |               |                    |       |                |       |       |                      |       |       |           |       |       |            |       |       |
| LA-selective   | 3.8           | 0.3                | 22.0% |                | NA    |       | 0.9                  | 0.3   | 0.0%  | 2.8       | 0.2   | 29.6% | 0.9        | 0.3   | 0.0%  |
| Mixed n-3/n-6  | 2.1           | 0.6                | 0.0%  |                | NA    |       | 1.9                  | 0.4   | 0.0%  | 2.1       | 0.6   | 0.0%  | 2.1        | 0.6   | 0.0%  |
| Combined group | 13.2          | 0.07               | 46.9% |                | NA    |       | 10.2                 | 0.04  | 60.9% | 13.1      | 0.04  | 54.3% | 12.1       | 0.03  | 58.7% |
| Between group  | 7.3           | 0.007 <sup>†</sup> |       |                | NA    |       | 7.4                  | 0.006 |       | 8.2       | 0.004 |       | 9.1        | 0.003 |       |
| All deaths     |               |                    |       |                |       |       |                      |       |       |           |       |       |            |       |       |
| LA-selective   | 4.6           | 0.2                | 35.0% | 4.6            | 0.2   | 34.7  | 0.9                  | 0.3   | 0.0%  | 4.6       | 0.1   | 56.2% | 0.9        | 0.3   | 0.0%  |
| Mixed n-3/n-6  | 2.6           | 0.5                | 0.0%  | 2.8            | 0.6   | 0.0   | 0.8                  | 0.7   | 0.0%  | 2.6       | 0.5   | 0.0%  | 2.6        | 0.5   | 0.0%  |
| Combined group | 11.0          | 0.1                | 36.4% | 11.0           | 0.2   | 27.4  | 9.6                  | 0.05  | 58.2% | 9.8       | 0.1   | 38.9% | 9.6        | 0.09  | 47.9% |
| Between group  | 3.8           | 0.05 <sup>†</sup>  |       | 3.7            | 0.056 |       | 7.8                  | 0.005 |       | 2.6       | 0.1   |       | 6.1        | 0.01  |       |

**Abbreviations:** CHD=coronary heart disease. CVD=cardiovascular disease.  $Q_{bet}$ =between-group heterogeneity.  $I^2$ =variation in the estimates attributable to heterogeneity. NA=not available.

<sup>†</sup>Test for heterogeneity between sub-groups should be interpreted with caution due to some heterogeneity observed in one or more sub-groups. Fixed effects model (STATA 11.2).



## Justification for stratification by PUFA intervention type

Pooled analysis of all RCTs (with no distinction among PUFA intervention type) revealed no significant effect on CHD, CVD, or all-cause mortality with hazard ratios close to 1.0 (**Webtable 7**). Heterogeneity analysis results were consistent with effect modification by PUFA intervention type (**Webtable 8**), with LA-selective interventions tending to increase mortality risk and mixed n-3/n-6 PUFA interventions tending to reduce mortality risk. For CHD death, these two intervention types had significantly different effects in both the main analysis ( $p=0.01$ ) and in various sensitivity analyses ( $p<0.01$ ), with minimal heterogeneity within either intervention category ( $I^2=0-7.5\%$ ). Comparable between-group heterogeneity was present for CVD death ( $p<0.01$ ) and all-cause mortality ( $p=0.05$ ), however these findings should be interpreted with some caution due to the presence of moderate heterogeneity within the LA-selective PUFA category ( $I^2=22\%$  and  $35\%$ , respectively). Heterogeneity within the LA-selective intervention category may be related to inclusion of both primary and secondary prevention trials, or trials of varying duration of diet exposure. In sensitivity analyses limiting the sample to secondary CHD prevention trials and/or mean follow-up  $>18$  months, heterogeneity among LA-selective trials was not seen, but between-group heterogeneity was still evident.

## Limitations of PUFA meta-analyses

The relatively small number of RCTs that have tested the effects of increasing PUFAs in place of SFA is an important limitation of our meta-analyses. However, a total of 11,275 participants were included in the main analysis; 9,569 in the four LA-selective datasets and 1,706 in four mixed n-3/n-6 datasets. Pooled risk estimates should be interpreted with some caution due to differences in design and population characteristics of the individual RCTs (reviewed in <sup>2</sup>). However, sensitivity analyses based on gender, trial duration, and established CHD provided directionally concordant results (**Webtable 7**), suggesting that the unfavorable effects of selectively increasing n-6 LA may be most pronounced with long-term exposure, particularly in patients with established CHD. Publication bias is a potential limitation of any meta-analysis, and precluded a full evaluation of the effects of PUFAs on CVD risk in previous meta-analyses. The recovery of unpublished SDHS data has permitted the most complete risk/benefit assessment of n-6 LA in RCTs to date.

## Interpretation

In the context of the findings of increased all-cause, CVD and CHD mortality in the LA intervention in the SDHS, these meta-analytic results provide strong supporting evidence that: (1) the specific PUFA composition of dietary interventions is a critical determinant of clinical CVD outcomes, and (2) selective substitution of n-6 LA for SFA is unlikely to be beneficial, particularly in patients with established CHD.

## IX. References

1. U.S. Department of Agriculture, Agricultural Research Service. 2012. USDA National Nutrient Database for Standard Reference, Release 25. Nutrient Data Laboratory Home Page, <http://www.ars.usda.gov/nutrientdata>.
2. XVIII World Medical Assembly (1964) World Medical Journal 11:284.
3. Ramsden CE, Hibbeln JR, Majchrzak SF, Davis JM. n-6 fatty acid-specific and mixed polyunsaturate dietary interventions have different effects on CHD risk: a meta-analysis of randomised controlled trials. *Br J Nutr* 2010;104(11):1586-600.
4. Turpeinen O, Karvonen MJ, Pekkarinen M, Miettinen M, Elosuo R, Paavilainen E. Dietary prevention of coronary heart disease: the Finnish Mental Hospital Study. *Int J Epidemiol* 1979;8(2):99-118.
5. Burr ML, Fehily AM, Gilbert JF, Rogers S, Holliday RM, Sweetnam PM, et al. Effects of changes in fat, fish, and fibre intakes on death and myocardial reinfarction: diet and reinfarction trial (DART). *Lancet* 1989;2(8666):757-61.
6. Frantz ID, Jr., Dawson EA, Ashman PL, Gatewood LC, Bartsch GE, Kuba K, et al. Test of effect of lipid lowering by diet on cardiovascular risk. The Minnesota Coronary Survey. *Arteriosclerosis* 1989;9(1):129-35.
7. Frantz I, Dawson E, Kuba K, Brewer E, Gatewood L, Bartsch G. The Minnesota Coronary Survey : Effect of diet on cardiovascular events and deaths. *American Heart Association Scientific Proceedings; 1975 October Circulation* 1975:p. II-4.
8. Jerome Cornfield Papers, MS 576. Ames, IA: Special Collections Department, Iowa State University Library.
9. Cornfield J. Jerome Cornfield Papers, MS 576. Ames, IA: Special Collections Department, Iowa State University Library,.
10. Frantz, ID (PI), Keys, A (Co-I). R01 HE 0986-03 Research Grant Application: Effect of a Dietary Change on Human Cardiovascular Disease "The Minnesota Coronary Survey". 1967.
11. Frantz, ID (PI), Keys, A (Co-I). R01 HE 0986-03 Second Supplementary Progress Report: Effect of a Dietary Change on Human Cardiovascular Disease "The Minnesota Coronary Survey". 1967.
12. Enig MG, Atal S, Keeney M, Sampugna J. Isomeric trans fatty acids in the U.S. diet. *J Am Coll Nutr* 1990;9(5):471-86.
13. Woodhill JM, Leelarthae-pin, B., Blacket, R.B., and Palmer, A.J. Efficacy of weight reduction and carbohydrate restriction in moderate type 4 hyperlipidaemia. *Cardiac society of Australia and New Zealand* 1975;5(5):488.
14. Woodhill JM, Palmer, A.J., and Blacket, R.B. Dietary habits and their modification in a coronary prevention programme for Australians. . *Food Technology in Australia* 1969;21:264-71.
15. Woodhill JM, Bernstei.L. Lowering Serum-Cholesterol Levels by Dietary Modification - Change in Food Habits, Not a Special Diet. *Med J Australia* 1973;1(20):973-79.
16. Woodhill JM, Palmer AJ, Leelarthae-pin B, McGilchrist C, Blacket RB. Low fat, low cholesterol diet in secondary prevention of coronary heart disease. *Adv Exp Med Biol* 1978;109:317-30.
17. Rose GA, Thomson WB, Williams RT. Corn Oil in Treatment of Ischaemic Heart Disease. *Br Med J* 1965;1(5449):1531-3.
18. Leren P. The effect of plasma cholesterol lowering diet in male survivors of myocardial infarction. A controlled clinical trial. *Acta Med Scand Suppl* 1966;466:1-92.
19. Leren P. The Oslo diet-heart study. Eleven-year report. *Circulation* 1970;42(5):935-42.
20. Watts GF, Lewis B, Brunt JN, Lewis ES, Coltart DJ, Smith LD, et al. Effects on coronary artery disease of lipid-lowering diet, or diet plus cholestyramine, in the St Thomas' Atherosclerosis Regression Study (STARS). *Lancet* 1992;339(8793):563-9.
21. Watts GF, Jackson P, Mandalia S, Brunt JN, Lewis ES, Coltart DJ, et al. Nutrient intake and progression of coronary artery disease. *Am J Cardiol* 1994;73(5):328-32.

22. Watts GF, Jackson P, Burke V, Lewis B. Dietary fatty acids and progression of coronary artery disease in men. *Am J Clin Nutr* 1996;64(2):202-9.
23. Dayton S, Chapman JM, Pearce ML, Popjak GJ. Cholesterol, atherosclerosis, ischemic heart disease, and stroke. *Ann Intern Med* 1970;72(1):97-109.
24. Dayton S, Hashimoto S, Dixon W, Pearce ML. Composition of lipids in human serum and adipose tissue during prolonged feeding of a diet high in unsaturated fat. *J Lipid Res* 1966;7(1):103-11.
25. Dayton S, Hashimoto S, Pearce ML. Influence of a diet high in unsaturated fat upon composition of arterial tissue and atheromata in man. *Circulation* 1965;32(6):911-24.
26. Dayton S, Hashimoto S, Pearce ML. Adipose tissue linoleic acid as a criterion of adherence to a modified diet. *J Lipid Res* 1967;8(5):508-10.
27. Dayton S, Pearce ML. Trial of unsaturated-fat diet. *Lancet* 1968;2(7581):1296-7.
28. Dayton S, Pearce ML. Diet high in unsaturated fat. A controlled clinical trial. *Minn Med* 1969;52(8):1237-42.
29. Dayton S, Pearce ML. Prevention of coronary heart disease and other complications of arteriosclerosis by modified diet. *Am J Med* 1969;46(5):751-62.
30. Dayton S, Pearce ML. Diet and atherosclerosis. *Lancet* 1970;1(7644):473-4.
31. Dayton S, Pearce ML, Goldman H, Harnish A, Plotkin D, Shickman M, et al. Controlled trial of a diet high in unsaturated fat for prevention of atherosclerotic complications. *Lancet* 1968;2(7577):1060-2.
32. Dayton S, Pearce ML, Hashimoto S, Fakler LJ, Hiscock E, Dixon WJ. A controlled clinical trial of a diet high in unsaturated fat. Preliminary observations. *N Engl J Med* 1962;266:1017-23.
33. Hiscock E, Dayton S, Pearce ML, Hashimoto S. A palatable diet high in unsaturated fat. *J Am Diet Assoc* 1962;40:427-31.
34. Pearce ML, Dayton S. Incidence of cancer in men on a diet high in polyunsaturated fat. *Lancet* 1971;1(7697):464-7.
35. Medical Research Council. Controlled trial of soya-bean oil in myocardial infarction. *Lancet* 1968;2(7570):693-9. *Lancet*;2(7570):693-9.
36. Clarke J, Hedley E, JW M, Wood J. Dietary Aspects of a Controlled Trial of Soya-bean Oil in Myocardial Infarction. *International Journal of Food Sciences and Nutrition* 1969;23(3):136-50.
37. Burr ML, Fehily AM. Fatty fish and heart disease: a randomized controlled trial. *World Rev Nutr Diet* 1991;66:306-12.
38. Burr ML, Fehily AM, Rogers S, Welsby E, King S, Sandham S. Diet and reinfarction trial (DART): design, recruitment, and compliance. *Eur Heart J* 1989;10(6):558-67.
39. Fehily A, Vaughan-Williams E, Shiels K, Williams A, Horner M, Bingham G, et al. Factors influencing compliance with dietary advice on nutrient intakes: evidence from the diet and reinfarction trial (DART). *Journal of Human Nutrition and Dietetics* 1991;4:33-42.
40. Fehily A, Vaughan-Williams E, Shiels K, al e. The effect of dietary advice on nutrient intakes: evidence from the diet and reinfarction trial (DART). *Journal of Human Nutrition and Dietetics* 1989;2:225-35.
41. Burr M. Reflections on the Diet and Reinfarction Trial (DART). *Eur Heart J* 2001;3(Supplement D):D75-D80.
42. Food and Agricultural Organization of the United Nations.
43. National Food Survey Department of Environmental, Food and Rural Affairs.
44. Significant Points from the Annual Report of Marrickville Holdings. Sydney Morning Herald. 1965 19 November.
45. National Diet-Heart Study Report: Faribault Second Study. *Circulation* 1968;37 & 38(S1):I.260-I.74.
46. Brewer ER, Ashman PL, Kuba K. Minnesota Coronary Survey - Composition of Diets, Adherence, and Serum-Lipid Response. *Circulation* 1975;52(4):269-69.
47. Fisher M. How Miracle Was Cowed - Margarine, Quotas, and Politics. *Aust Quart* 1970;42(2):20-33.

48. Miettinen M, Turpeinen O, Karvonen MJ, Elosuo R, Paavilainen E. Effect of cholesterol-lowering diet on mortality from coronary heart-disease and other causes. A twelve-year clinical trial in men and women. *Lancet* 1972;2(7782):835-8.
49. Miettinen M, Turpeinen O, Karvonen MJ, Pekkarinen M, Paavilainen E, Elosuo R. Dietary prevention of coronary heart disease in women: the Finnish mental hospital study. *Int J Epidemiol* 1983;12(1):17-25.
50. Turpeinen O. Diet and coronary events. *J Am Diet Assoc* 1968;52(3):209-13.
51. Turpeinen O. Effect of cholesterol-lowering diet on mortality from coronary heart disease and other causes. *Circulation* 1979;59(1):1-7.
52. Turpeinen O, Miettinen M, Karvonen MJ, Roine P, Pekkarinen M, Lehtosuo EJ, et al. Dietary prevention of coronary heart disease: long-term experiment. I. Observations on male subjects. *Am J Clin Nutr* 1968;21(4):255-76.
